# Supplementary material for: Achieving above 24% efficiency with non-toxic CsSnI3 perovskite solar cells by harnessing the potential of the absorber and charge transport layers
Source: Royal Society of Chemistry journal article supplement (doi:10.1039/d3ra02910g), 2023-01-01
Supplement: d3ra02910g1.pdf [file d3ra02910g1.pdf]

## SUPPORTING INFORMATION

### Achieving above 24% efficiency from non-toxic CsSnI<sub>3</sub> perovskite solar cells through harnessing the potential of the absorber and charge transport layers

M. Khalid Hossain<sup>1\*</sup>, M. Shihab Uddin<sup>2</sup>, G. F. Ishraque Toki<sup>3</sup>, Mustafa K. A. Mohammed<sup>4</sup>, Rahul Pandey<sup>5</sup>, Jaya Madan<sup>5,\*\*</sup>, Md. Ferdous Rahman<sup>6</sup>, Md. Rasidul Islam<sup>7</sup>, Sagar Bhattarai<sup>8</sup>, H. Bencherif<sup>9</sup>, D. P. Samajdar<sup>10</sup>, Mongi Amami<sup>11</sup>, D. K. Dwivedi<sup>12</sup>

<sup>1</sup>*Institute of Electronics, Atomic Energy Research Establishment, Bangladesh Atomic Energy Commission, Dhaka 1349, Bangladesh*

<sup>2</sup>*Department of Electrical and Electronic Engineering, Islamic University, Kushtia 7000, Bangladesh*

<sup>3</sup>*College of Materials Science and Engineering, Donghua University, Shanghai 201620, China*

<sup>4</sup>*University of Warith Al-Anbiyaa, 56001 Karbala, Iraq*

<sup>5</sup>*VLSI Centre of Excellence, Chitkara University Institute of Engineering and Technology, Chitkara University, Punjab 140401, India*

<sup>6</sup>*Advanced Energy Materials and Solar Cell Research Laboratory, Department of Electrical and Electronic Engineering, Begum Rokeya University, Rangpur 5400, Bangladesh*

<sup>7</sup>*Department of Electrical and Electronic Engineering, Bangamata Sheikh Fojilatunnesa Mujib Science & Technology University, Jamalpur 201 Bangladesh*

<sup>8</sup>*Department of Physics, Arunachal University of Studies, Namsai, 792103, Arunachal Pradesh, India*

<sup>9</sup>*LEREESI, Higher National School of Renewable Energies, Environment and Sustainable Development, Batna 05078, Algeria*

<sup>10</sup>*Dept. of ECE, Indian Institute of Information Technology, Design & Manufacturing, Madhya Pradesh 482005, India*

<sup>11</sup>*Department of Chemistry, College of Sciences, King Khalid University, P.O. Box 9004, Abha, Saudi Arabia*

<sup>12</sup>*Department of Physics and Material Science, Madan Mohan Malaviya University of Technology, Gorakhpur-273010, U.P., India*

Correspondence: \*khalid.baec@gmail.com; khalid@kyudai.jp; and \*\*jaya.madan@chitkara.edu.in

#### Table of content

**Table S1.** Performance of back metal contacts with several studied HTLs

**S2**

**Table S1.** Performance of back metal contacts with several studied HTLs

| HTL                 | Performance parameters | Back metal contact |        |       |       |       |        |        |        |        |        |
|---------------------|------------------------|--------------------|--------|-------|-------|-------|--------|--------|--------|--------|--------|
|                     |                        | Cu                 | Ag     | Fe    | C     | Au    | W      | Ni     | Pd     | Pt     | Se     |
| <b>CuSCN</b>        | <i>V</i> <sub>oc</sub> | 0.898              | 0.538  | 0.910 | 0.909 | 0.909 | 0.909  | 0.909  | 0.909  | 0.909  | 0.909  |
|                     | <i>J</i> <sub>sc</sub> | 14.09              | 13.55  | 14.22 | 14.24 | 14.24 | 14.24  | 14.24  | 14.24  | 14.24  | 14.24  |
|                     | FF                     | 63.18              | 45.12  | 75.89 | 78.11 | 78.11 | 78.11  | 78.11  | 78.11  | 78.11  | 78.11  |
|                     | PCE                    | 7.99               | 3.29   | 9.81  | 10.10 | 10.10 | 10.10  | 10.10  | 10.10  | 10.10  | 10.10  |
| <b>NiO</b>          | <i>V</i> <sub>oc</sub> | 0.906              | 0.595  | 0.909 | 0.909 | 0.909 | 0.909  | 0.909  | 0.909  | 0.909  | 0.909  |
|                     | <i>J</i> <sub>sc</sub> | 14.13              | 13.63  | 14.23 | 14.24 | 14.24 | 14.24  | 14.24  | 14.24  | 14.24  | 14.24  |
|                     | FF                     | 66.35              | 46.39  | 77.44 | 78.11 | 78.11 | 78.11  | 78.11  | 78.11  | 78.11  | 78.11  |
|                     | PCE                    | 8.49               | 3.76   | 10.02 | 10.10 | 10.10 | 10.10  | 10.10  | 10.10  | 10.10  | 10.10  |
| <b>P3HT</b>         | <i>V</i> <sub>oc</sub> | 0.909              | 0.6749 | 0.909 | 0.909 | 0.909 | 0.909  | 0.909  | 0.909  | 0.909  | 0.909  |
|                     | <i>J</i> <sub>sc</sub> | 14.19              | 13.77  | 14.23 | 14.24 | 14.24 | 14.24  | 14.24  | 14.24  | 14.24  | 14.24  |
|                     | FF                     | 73.33              | 50.89  | 78.06 | 78.11 | 78.11 | 78.11  | 78.11  | 78.11  | 78.11  | 78.11  |
|                     | PCE                    | 9.46               | 4.73   | 10.10 | 10.10 | 10.10 | 10.10  | 10.10  | 10.10  | 10.10  | 10.10  |
| <b>PEDOT: PSS</b>   | <i>V</i> <sub>oc</sub> | 0.909              | 0.761  | 0.909 | 0.909 | 0.909 | 0.909  | 0.909  | 0.909  | 0.909  | 0.909  |
|                     | <i>J</i> <sub>sc</sub> | 14.23              | 13.91  | 14.24 | 14.24 | 14.24 | 14.24  | 14.24  | 14.24  | 14.24  | 14.24  |
|                     | FF                     | 77.79              | 56.21  | 78.11 | 78.11 | 78.11 | 78.11  | 78.11  | 78.11  | 78.11  | 78.11  |
|                     | PCE                    | 10.06              | 5.95   | 10.10 | 10.10 | 10.10 | 10.10  | 10.10  | 10.10  | 10.10  | 10.10  |
| <b>Spiro-MeOTAD</b> | <i>V</i> <sub>oc</sub> | 0.886              | 0.508  | 0.909 | 0.909 | 0.909 | 0.909  | 0.909  | 0.909  | 0.909  | 0.909  |
|                     | <i>J</i> <sub>sc</sub> | 14.03              | 13.42  | 14.18 | 14.23 | 14.23 | 14.23  | 14.23  | 14.23  | 14.23  | 14.23  |
|                     | FF                     | 58.3               | 38.19  | 71.49 | 77.99 | 78.02 | 78.02  | 78.02  | 78.02  | 78.02  | 78.02  |
|                     | PCE                    | 7.25               | 2.61   | 9.21  | 10.09 | 10.09 | 10.09  | 10.09  | 10.09  | 10.09  | 10.09  |
| <b>CuI</b>          | <i>V</i> <sub>oc</sub> | 0.909              | 0.695  | 0.909 | 0.909 | 0.909 | 0.9086 | 0.9086 | 0.9086 | 0.9086 | 0.9086 |
|                     | <i>J</i> <sub>sc</sub> | 14.21              | 13.81  | 14.24 | 14.24 | 14.24 | 14.24  | 14.24  | 14.24  | 14.24  | 14.24  |
|                     | FF                     | 75.51              | 53.09  | 78.1  | 78.11 | 78.11 | 78.11  | 78.11  | 78.11  | 78.11  | 78.11  |
|                     | PCE                    | 9.76               | 5.10   | 10.10 | 10.10 | 10.10 | 10.10  | 10.10  | 10.10  | 10.10  | 10.10  |
| <b>CFTS</b>         | <i>V</i> <sub>oc</sub> | 0.909              | 0.909  | 0.909 | 0.909 | 0.909 | 0.909  | 0.909  | 0.909  | 0.909  | 0.909  |
|                     | <i>J</i> <sub>sc</sub> | 14.23              | 14.23  | 14.23 | 14.23 | 14.23 | 14.23  | 14.23  | 14.23  | 14.23  | 14.23  |
|                     | FF                     | 78.11              | 78.11  | 78.11 | 78.11 | 78.11 | 78.11  | 78.11  | 78.11  | 78.11  | 78.11  |
|                     | PCE                    | 10.10              | 10.10  | 10.10 | 10.10 | 10.10 | 10.10  | 10.10  | 10.10  | 10.10  | 10.10  |
